# Supplementary material for: Modifications in Gene Expression in the Process of Osteoblastic Differentiation of Multipotent Bone Marrow-Derived Human Mesenchymal Stem Cells Induced by a Novel Osteoinductive Porous Medical-Grade 3D-Printed Poly(ε-caprolactone)/β-tricalcium Phosphate Composite
Source: MDPI journal article supplement (doi:10.3390/ijms222011216), 2021-10-18
Supplement: s1 [file s1]

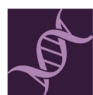

## SUPPLEMENTARY INFORMATION

Article

# Modifications in gene expression in the process of osteoblastic differentiation of multipotent bone marrow-derived human mesenchymal stem cells induced by a novel osteoinductive porous medical-grade 3D-printed poly( $\epsilon$ -caprolactone)/ $\beta$ -tricalcium phosphate composite

Ivan López-González <sup>1,\*†</sup>, Camilo Zamora-Ledezma <sup>1,†</sup>, María Isabel Sanchez-Lorencio <sup>2</sup>, Elena Tristante Barrenechea <sup>3</sup>, Gabaldón J.A. <sup>4</sup> and Luis Meseguer-Olmo <sup>1,\*†</sup>

<sup>1</sup> Tissue Regeneration and Repair Group: Orthobiology, Biomaterials and Tissue Engineering. UCAM- Universidad Católica de Murcia, Campus de los Jerónimos 135, Guadalupe, 30107 Murcia, Spain. ilopez27@ucam.edu (I.L.-G.); lmeseguer@ucam.edu (L.M.-O); czamora9@ucam.edu (C.Z.-L.)

<sup>2</sup> Biomedical Research Institute of Murcia (IMIB-Arrixaca-UMU), University Clinical Hospital “Virgen de la Arrixaca”, University of Murcia, El Palmar, 30120 Murcia, Spain. msl70082@um.es (M.I.S.-L.)

<sup>3</sup> Plataforma Sala Blanca. IMIB-Arrixaca. Carretera Madrid-Cartagena S/N. El Palmar, 30120, Murcia, Spain. elena.tristante@imib.es (E.T.B)

<sup>4</sup> Molecular Recognition and Encapsulation Research Group (REM), Health Sciences Department, UCAM- Universidad Católica de Murcia, Campus de los Jerónimos 135, Guadalupe, 30107 Murcia, Spain; jagabaldon@ucam.edu (G.J.A.)

\* Correspondence: ilopez27@ucam.edu (I.L.-G.), lmeseguer@ucam.edu (L.M.-O); Tel.: +34- 968-278800

† These authors contributed equally to this work

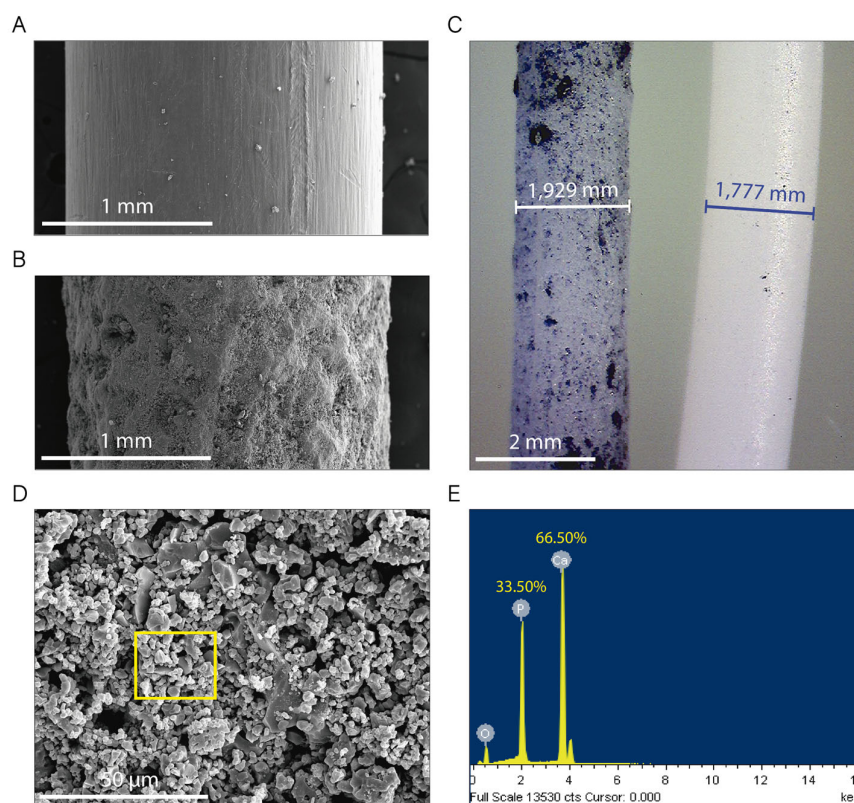

**Figure S1.** SEM micrographs of the (A) native PCL and (B) PCL/β-TCP filaments. (C) Image of both filaments taken with a stereomicroscope at 3X magnification. The β-TCP microparticles were stained with nigrosine to get clear and highly defined images. (D) Micrograph showing a magnification of the β-TCP microparticles coating the filament and (E) its corresponding EDX spectrum. The researched area is depicted as a yellow square
